# Supplementary material for: Comparison of Mycoplasma pneumoniae Genome Sequences from Strains Isolated from Symptomatic and Asymptomatic Patients
Source: Front Microbiol. 2016 Oct 27;7:1701. doi: 10.3389/fmicb.2016.01701 (PMC5081376; doi:10.3389/fmicb.2016.01701)
Supplement: Supplementary Table 1 — Differences between the reference sequence and the reads as determined by interpreting the output of samtools mpileup. [file DataSheet1_v1.XLSX]

## Sheet: best_contig_assemblies
	raw data				Assembly								BWA			Variant calling
sample	reads (n)	contigs (n)	n.500 (n)	n.N50 (n)	min (bp)	N80 (bp)	N50 (bp)	N20 (bp)	max (bp)	sum (contigs > 500; bp)	kmer	total_sum (bp)	mapped to M129	mapped	variants to M129 (f>0.2, depth>20)	deletions (f>0.2, depth>20)	insertions (f>0.2, depth>20)
I12-1149-01	12312986	193	54	5	531	25445	59602	93071	135172	802479	95	828014	11351267	0.921894	140	14	8
I12-1149-02	15880668	256	65	6	534	19471	50959	92683	98770	803911	95	836748	13905436	0.87562	1415	63	52
I12-1149-03	18237272	252	54	6	523	25453	54253	72228	123538	800612	90	835350	16734355	0.917591	1434	60	54
I12-1149-04	22931298	268	57	6	535	25444	54265	72228	123550	800489	90	837171	21227454	0.925698	1441	57	52
I12-1149-05	24359148	297	57	6	525	25434	54255	72218	123540	805945	85	847063	22566991	0.926428	1433	57	53
I12-1149-06	14236426	261	66	5	504	19946	54703	92731	135171	800399	95	835067	12282214	0.862732	391	21	23
I12-1149-07	26409770	441	81	7	500	18760	45886	72238	92532	821841	95	881571	24649662	0.933354	379	25	23
I12-1149-08	18976996	192	49	4	511	31272	66615	191496	191496	802814	95	828473	17958187	0.946313	385	21	25
I12-1149-09	17166632	370	86	6	504	18811	51728	72238	92731	800436	95	848192	13794782	0.803581	388	20	24
I12-1149-10	9562958	172	56	6	543	30537	54427	72976	135217	808319	95	828927	8501884	0.889043	1448	57	54
I12-1149-11	11295900	168	53	5	511	25485	53512	92731	135177	805944	95	827957	9917504	0.877974	378	24	24
I12-1149-12	19624370	271	59	5	511	25465	66934	92711	96961	801799	85	838498	18016402	0.918063	383	21	24
I12-1149-13	16501684	380	68	6	510	25465	48754	92664	98587	790390	95	842779	14724479	0.892302	1444	61	49
I12-1149-14	17740972	245	56	6	510	25231	51557	92683	98962	804626	95	837755	15992988	0.901472	1432	61	49
I12-1149-15	13941048	192	64	5	507	25478	59355	92730	135170	809160	95	830896	12053906	0.864634	383	22	27
I12-1149-16	16570952	158	50	5	511	25485	59440	92731	135171	807258	95	826881	15492250	0.934904	393	21	26
I12-1149-17	16202678	219	56	4	501	25475	66641	191498	191498	804586	90	831814	15426023	0.952066	393	21	27
I12-1149-18	18897466	170	54	4	504	23163	66444	191508	191508	805135	95	825778	17834177	0.943734	388	24	28
I12-1149-19	14742908	179	55	5	511	25485	59621	92731	135258	806820	95	829939	13055139	0.88552	392	21	27
I12-1149-20	16694932	213	58	5	501	25475	59300	92721	135161	805824	90	831754	15878306	0.951085	380	20	24
